# Supplementary material for: Efficient Detection of Pathogenic Leptospires Using 16S Ribosomal RNA
Source: PubMed Central journal article supplement (PMC4474562; doi:10.1371/journal.pone.0128913), 2015-06-19
Supplement: pone.0128913.s002.pdf [file pone.0128913.s002.pdf]

**S1 Table: Leptospira species and serovars used in the study**

| <b>Species</b>                          | <b>Serogroup</b>    | <b>Serovar</b> | <b>Strain</b>  |
|-----------------------------------------|---------------------|----------------|----------------|
| <b>Pathogenic <i>Leptospira</i></b>     |                     |                |                |
| <i>L. alexanderi</i>                    | Manhao              | Manhoa 3       | L 60T          |
| <i>L. alstoni</i>                       | Ranarum             | Pingchang      | 80-412T        |
| <i>L. interrogans</i>                   | Canicola            | Canicola       | Kito           |
| <i>L. interrogans</i>                   | Icterohaemorrhagiae | Copenhageni    | Fiocruz L1-130 |
| <i>L. interrogans</i>                   | Pyrogenes           | Manilae        | L495           |
| <i>L. borgpetersenii</i>                | Mini                | Mini           | 200901116      |
| <i>L. kirschneri</i>                    | Grippotyphosa       | Grippotyphosa  | RM52           |
| <i>L. kmetyi</i>                        | Tarassovi           | Malaysia       | Bejo-Iso9      |
| <i>L. noguchii</i>                      | Autumnalis          | ND             | Bonito         |
| <i>L. santarosai</i>                    | Shermani            | Shermani       | 1342 KT        |
| <i>L. santarosai</i>                    | Tarassovi           | ND             | AIM            |
| <b>Intermediate <i>Leptospira</i></b>   |                     |                |                |
| <i>L. broomii</i>                       | ND                  | ND             | 5399T          |
| <i>L. fainei</i>                        | Hurstbridge         | Hurstbridge    | BUT 6T         |
| <i>L. inadai</i>                        | ND                  | Lyme           | 10T            |
| <i>L. licerasiae</i>                    | Iquitos             | Varillal       | VAR 010        |
| <i>L. wolffii</i>                       | ND                  | ND             | Khorat-H2T     |
| <b>Non-Pathogenic <i>Leptospira</i></b> |                     |                |                |
| <i>L. biflexa</i>                       | Semarang            | Patoc          | Patoc1         |
| <i>L. meyeri</i>                        | Sejroe              | Hardjo         | Went 5         |
| <i>L. terpstrae</i>                     | ND                  | Hualin         | LT 11-33T      |
| <i>L. vanthielii</i>                    | ND                  | Holland        | Waz Holland    |
| <i>L. yanagawae</i>                     | ND                  | Saopaulo       | Sao Paulo      |
