# Supplementary material for: Efficient Detection of Pathogenic Leptospires Using 16S Ribosomal RNA
Source: PubMed Central journal article supplement (PMC4474562; doi:10.1371/journal.pone.0128913), 2015-06-19
Supplement: pone.0128913.s003.pdf [file pone.0128913.s003.pdf]

**S2 Table: Oligonucleotide primers used in the study**

| <b>Primer</b> | <b>Amplicon<br/>(base pair)</b> | <b>Forward</b>        | <b>Reverse</b>        |
|---------------|---------------------------------|-----------------------|-----------------------|
| 16S-1         | 211                             | GCGTAGGCGGACATGTAAGT  | AATCCCGTTCACTACCCACG  |
| 16S-2         | 235                             | TAAAGGCTCACCAAGGCGAC  | TTAGCCGGTGCTTTAGGCAG  |
| LipL32-1      | 190                             | GCCGTAATCGCTGAAATGGG  | CTTTGGCGATTTGGTCAGGC  |
| LipL32-2      | 262                             | TGGCTATCTCCGTTGCACTC  | CCCATTTCAGCGATTACGGC  |
| FlaB-1        | 192                             | GCTCGTGCAGGTGGAAGTAT  | GCCTTTGAAGTCATCGTGCC  |
| FlaB-2        | 183                             | GCTAACGACGTGATCGGTCT  | CGAGACAACCTTCTTCCGCCA |
| LipL41-1      | 184                             | GTGCAGACGCAATCAACGAA  | GCGAAACCTGCCACTTTCAA  |
| LipL41-2      | 156                             | CGTAGGTTTGGCTGTTGAAGC | GCGTCTGCACGTTTACTCAG  |
| LipL-31       | 180                             | TCGATGCGATGAGTCGAGTT  | AACCGTCTTTTTTCAGCTGCG |
