# Supplementary material for: Efficient Detection of Pathogenic Leptospires Using 16S Ribosomal RNA
Source: PLoS One. 2015 Jun 19;10(6):e0128913. doi: 10.1371/journal.pone.0128913 (PMC4474562; doi:10.1371/journal.pone.0128913)
Supplement: S1 Fig — Nucleotide sequences within the primer sequences of 16S rRNA genes from 37 Leptospira serovars, including all 20 known species, as well as non-target bacteria including other major pathogenic spirochetes, were derived from NCBI nucleotide sequence databases and aligned using MegAlign (DNASTAR software). Base pair mismatches between L. interrogans Fiocruz L1-130 and other species are indicated by boxes. (PDF) [file pone.0128913.s001.pdf]

S1 Fig.

16S-1 forward

Majority

*Leptospira interrogans* serovar Copenhagen  
*Leptospira interrogans* serovar Icteroha  
*Leptospira interrogans* serovar Icteroha  
*Leptospira interrogans* serovar Lai str.  
*Leptospira interrogans* strain RGA.seq  
*Leptospira kirschneri* serovar Cynopteri  
*Leptospira noguchii* serovar Panama str a  
*Leptospira noguchii* serovar Panama str a  
*Leptospira noguchii* serovar Panama str a  
*Leptospira alexanderi* serovar Manhao 3  
*Leptospira welii* serovar Celledoni str  
*Leptospira welii* strain Celledoni.seq  
*Leptospira borgpetersenii* serovar Javan  
*Leptospira borgpetersenii* serovar Javan  
*Leptospira borgpetersenii* serovar Hardj  
*Leptospira santarosai* serovar Shermani  
*Leptospira santarosai* serovar Shermani  
*Leptospira kmetyi* serovar Malaysia str a  
*Leptospira broomii* strain 5399.seq  
*Leptospira fainel* serovar Hurstbridge s  
*Leptospira fainel* serovar Hurstbridge s  
*Leptospira inadai* serovar Lyme strain 1  
*Leptospira licerisae* serovar Varilla  
*Leptospira wolffii* serovar Khorat strai  
*Leptospira biflexa* serovar Patoc strain  
*Leptospira biflexa* serovar Patoc strain  
*Leptospira biflexa* serovar Patoc strain  
*Leptospira meyeri* serovar Ranarum strai  
*Leptospira wolbachii* serovar Codice str  
*Leptospira wolbachii* strain CDC BIFLEXA  
*Leptospira vanthielii* serovar Holland s  
*Leptospira terpestrae* serovar Hualin str  
*Leptospira yanagawa* serovar Saopaulo s  
*Leptospira idonii* 16S ribosomal.seq  
*Borrelia* sp. B31.seq  
*Brevibacillus brevis* NBRC 100599 47.seq  
*Turneriella parva* DSM 21527.seq  
*Staphylococcus haemolyticus* JCS1435 st  
*Staphylococcus epidermidis* RP62A strain  
*Staphylococcus aureus* subsp. aureus N31  
*Streptococcus suis* BM407 strain BM407.s  
*Streptococcus mutans* strain ATCC 25175.  
*Clostridium difficile* 630 strain 630C seq  
*Salmonella enterica* subsp. enterica ser  
*Mycobacterium tuberculosis* strain H37Rv  
*Escherichia coli* O157. H7 str. Sakai str  
*Escherichia coli* str. K-12 substr. MG16  
*Klebsiella pneumoniae* subsp. pneumoniae  
*Borrelia recurrentis* A1 strain A1.seq  
*Borrelia miyamotoi*.seq  
*Borrelia hermslii* DAH strain DAH.seq  
*Borrelia afzelii* PKo strain PKo.seq  
*Borrelia burgdorferi* N40 strain N40.seq  
*Borrelia garinii* PBI strain PBI.seq  
*Borrelia bissetti* strain DN127.seq  
*Treponema pallidum* subsp. pallidum SS14  
*Treponema denticola* strain ATCC 35405.

[illegible]

## 16S-1 reverse

Majority

*Leptospira interrogans* serovar Copenhagen  
*Leptospira interrogans* serovar Icteroha  
*Leptospira interrogans* serovar Icteroha  
*Leptospira interrogans* serovar Icteroha  
*Leptospira interrogans* serovar Lai str.  
*Leptospira interrogans* strain RGA.seq  
*Leptospira kirschneri* serovar Cynopteri  
*Leptospira noguchii* serovar Panama str  
*Leptospira noguchii* serovar Panama str  
*Leptospira noguchii* serovar Panama str  
*Leptospira alexanderi* serovar Mahao 3  
*Leptospira weilii* serovar Celledoni str  
*Leptospira weilii* strain Celledoni.seq  
*Leptospira borgpetersenii* serovar Javan  
*Leptospira borgpetersenii* serovar Javan  
*Leptospira santarosae* serovar Shermani  
*Leptospira santarosae* serovar Shermani  
*Leptospira kmetyi* serovar Malaysia str  
*Leptospira broomii* strain 5399.seq  
*Leptospira fainel* serovar Hurstbridge s  
*Leptospira fainel* serovar Hurstbridge s  
*Leptospira inadai* serovar Lyme strain 1  
*Leptospira ictericae* serovar Varillai  
*Leptospira wofflii* serovar Khorat strai  
*Leptospira biflexa* serovar Patoc strain  
*Leptospira biflexa* serovar Patoc strain  
*Leptospira biflexa* serovar Patoc strain  
*Leptospira mayeri* serovar Ranarum strai  
*Leptospira wolbachii* serovar Codice str  
*Leptospira wolbachii* strain CDC BIFLEXA  
*Leptospira vanthiili* serovar Holland s  
*Leptospira terpstrae* serovar Hualin str  
*Leptospira yanagawa* serovar Saopaulo s  
*Leptospira idonii* 16S rribosomal.seq  
*Borrelia* sp. B31.seq  
*Brevibacillus brevis* NBRC 100599 47.seq  
*Turnerella parva* DSM 21527.seq  
*Staphylococcus haemolyticus* JCS1435 st  
*Staphylococcus epidermidis* RP62A strain  
*Staphylococcus aureus* subsp. aureus N81  
*Streptococcus suis* BM407 strain BM407.s  
*Streptococcus mutans* strain ATCC 25175.  
*Clostridium difficile* 630 strain 630C.seq  
*Salmonella enterica* subsp. enterica ser  
*Mycobacterium tuberculosis* strain H37Rv  
*Escherichia coli* O157.H7 str. Sakai str  
*Escherichia coli* str. K-12 substr. MG16  
*Klebsiella pneumoniae* subsp. pneumoniae  
*Borrelia recurrentis* A1 strain A1.seq  
*Borrelia miyamotoi*.seq  
*Borrelia hermsii* DA.H strain DA.H.seq  
*Borrelia afzelii* PKo strain PKo.seq  
*Borrelia burgdorferi* N40 strain N40.seq  
*Borrelia garinii* PBI strain PBI.seq  
*Borrelia bissetti* strain DM127.seq  
*Treponema pallidum* subsp. pallidum SS14  
*Treponema denticola* strain A TCC 35405.

[illegible]
